# Supplementary material for: Effects of Menaquinone-7 on the Bone Health of Growing Rats under Calcium Restriction: New Insights from Microbiome-Metabolomics
Source: MDPI journal article supplement (doi:10.3390/nu15153398), 2023-07-31
Supplement: s1 [file s1]

# Effects of menaquinone-7 on the bone health of growing rats under calcium restriction: new insights from microbiome-metabolomics

**Table S1.** Results of MK-7 on body weight and Kidney coefficient in rats under calcium restriction

| Group | Body weight<br>(0 week) (g) | Body weight<br>(13 week) (g) | Body weight<br>gain (g)     | Kidney<br>weight(g) | Kidney<br>coefficient(%bw) |
|-------|-----------------------------|------------------------------|-----------------------------|---------------------|----------------------------|
| NC    | 154.06±13.05                | 572.79±64.91 <sup>a</sup>    | 417.89±57.67 <sup>a</sup>   | 3.50±0.46           | 0.62±0.05 <sup>b,c</sup>   |
| LC    | 152.20±13.31                | 493.51±40.31 <sup>b</sup>    | 341.31±40.45 <sup>b</sup>   | 3.55±0.43           | 0.70±0.05 <sup>a</sup>     |
| RC    | 157.70±20.02                | 537.06±47.06 <sup>a,b</sup>  | 379.35±48.39 <sup>a,b</sup> | 3.52±0.29           | 0.66±0.05 <sup>a,b</sup>   |
| LMK   | 155.88±13.57                | 563.94±45.82 <sup>a</sup>    | 408.06±45.22 <sup>a</sup>   | 3.59±0.27           | 0.64±0.05 <sup>b,c</sup>   |
| MMK   | 157.63±15.71                | 576.00±54.01 <sup>a</sup>    | 418.37±48.99 <sup>a</sup>   | 3.51±0.28           | 0.61±0.05 <sup>c</sup>     |
| HMK   | 151.52±10.27                | 563.32±68.38 <sup>a</sup>    | 411.79±65.23 <sup>a</sup>   | 3.41±0.51           | 0.60±0.05 <sup>c</sup>     |

Values are expressed as the Mean ± SD. Different superscript letters in columns indicate significant differences among groups ( $p < 0.05$ ) following ANOVA and LSD multiple-comparison test. n = 12/group. Rat groups consisted of low calcium administration (LC), normal calcium administration (NC), 75% normal calcium and 148% normal vitamin D<sub>3</sub> administration (RC), MK-7 treated (LMK, MMK, HMK, doses at 0.1, 1 and 10 mg/kg.bw, respectively) with feeding the RC diet.

**Table S2.** Results of MK-7 on bone turnover markers of in rats under calcium restriction

| Group | PINP<br>(ng/ml) | IGF-1<br>(pg/ml) |
|-------|-----------------|------------------|
| LC    | 4.41±1.98       | 159.29±52.47     |
| NC    | 3.39±1.38       | 151.08±51.23     |
| RC    | 3.49±0.89       | 160.68±55.04     |
| LMK   | 3.14±0.95       | 151.52±42.39     |
| MMK   | 3.17±0.59       | 145.49±49.03     |
| HMK   | 3.87±1.29       | 136.50±36.52     |

Values are expressed as the Mean ± SD. Different superscript letters in columns indicate significant differences among groups ( $p < 0.05$ ) following ANOVA and LSD multiple-comparison test. n = 12/group. Rat groups consisted of low calcium administration (LC), normal calcium administration (NC), 75% normal calcium and 148% normal vitamin D<sub>3</sub> administration (RC), MK-7 treated (LMK, MMK, HMK, doses at 0.1, 1 and 10 mg/kg.bw, respectively) with feeding the RC diet.

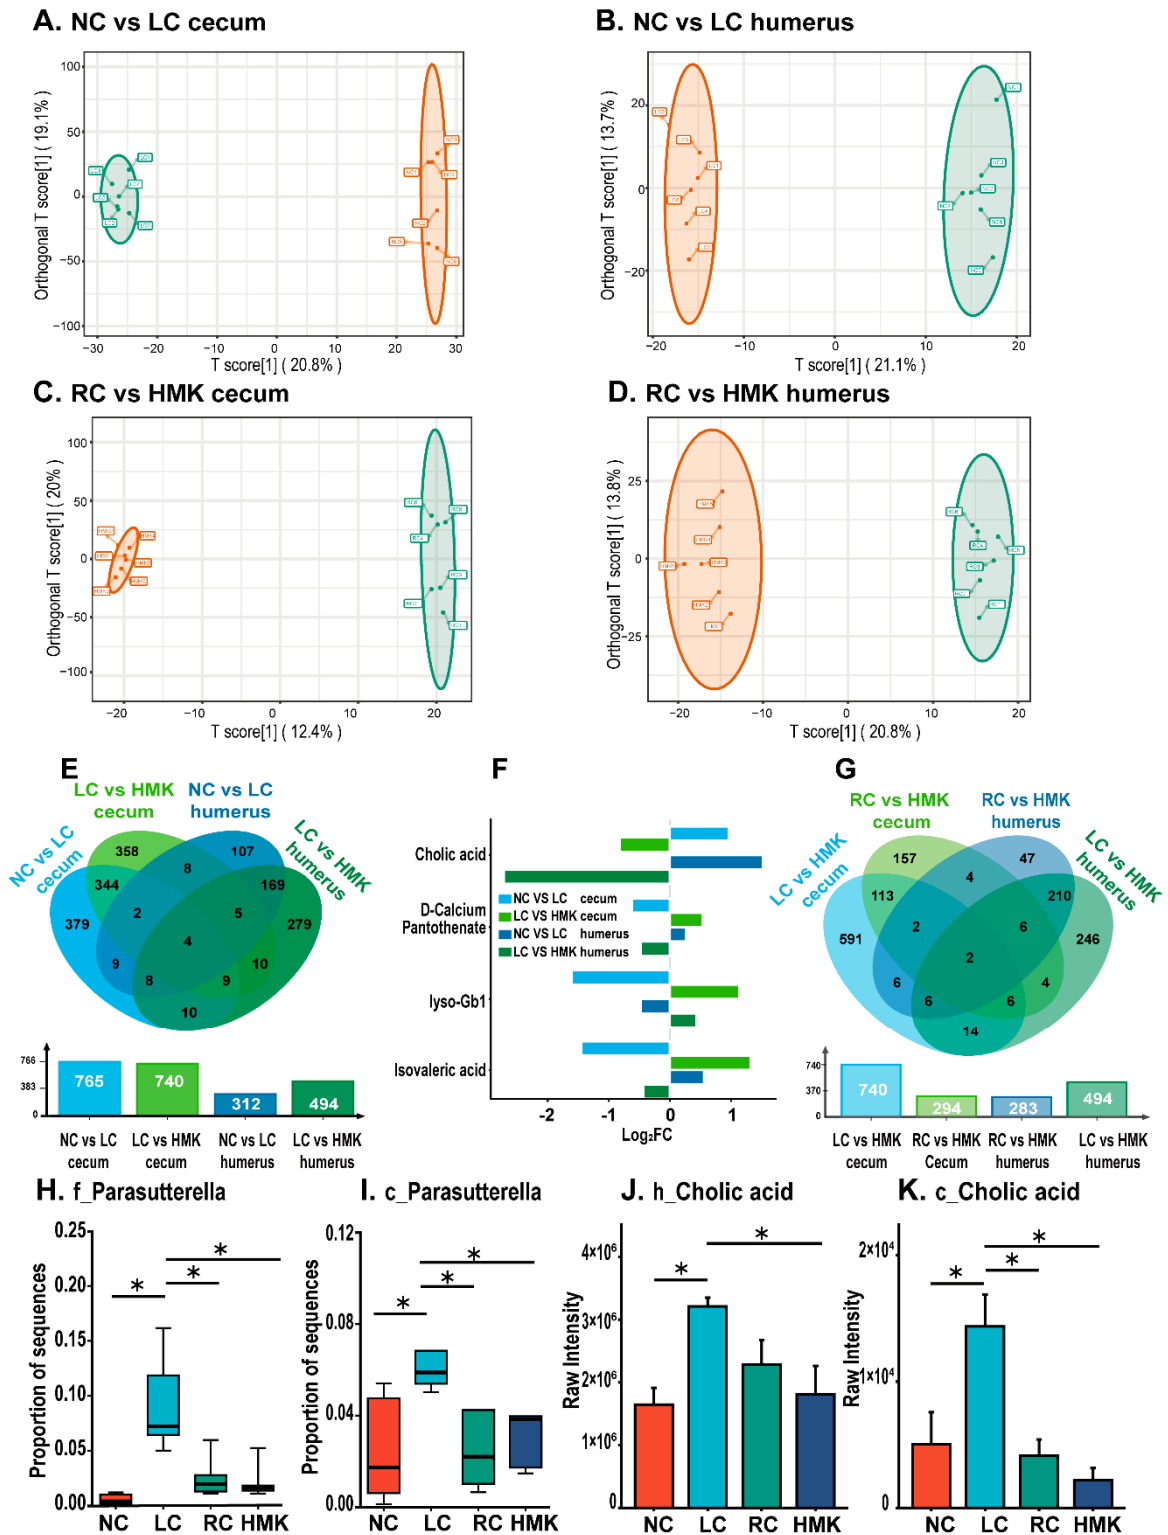

**Figure S1.** Metabolic profile in calcium-deficient growing rats following MK-7 supplementation (n = 6/group). (A, B) OPLS-DA score plots between the NC and LC groups' cecal content and humerus samples. (C, D) OPLS-DA score plots between the RC and HMK groups' cecal content and humerus samples. (E) A Venn diagram summarizing the significantly changed metabolites overlapping between the LC and either the NC or HMK group. (F) Barplots showing the four significantly overlapped altered metabolites (log2 fold change). (G) A Venn diagram summarizing the significantly changed metabolites overlapping between the HMK and either the LC or NC group. (H, I) The relative abundance of genus *Parasutterella* in the fecal and cecal content (t-test). (J) The raw intensity of cholic acid in the humerus (t-test). (K) The raw intensity of cholic acid in the cecal content sample (Wilcoxon test). The prefixes 'f', 'c', and 'h' before the flora and metabolites denote detection in feces, cecal content, and humerus, respectively.



**Table S3** The overlapped three pathways due to calcium deficiency or MK-7 supplementation

| Pathway                           | Group     | P value | Sample  | Up metabolites <sup>1</sup>                                                                                               | Down metabolites                                                                                                                                                                   |
|-----------------------------------|-----------|---------|---------|---------------------------------------------------------------------------------------------------------------------------|------------------------------------------------------------------------------------------------------------------------------------------------------------------------------------|
| purine metabolism                 | NC vs LC  | 0.016   | cecum   | Urea, Adenine, 2'-Deoxyadenosine                                                                                          | Xanthine, L-Glutamine, Sulfate, Oxalic acid                                                                                                                                        |
|                                   |           | 0.649   | humerus | 2'-Deoxyinosine, Uric acid, Cyclic GMP<br>Xanthosine                                                                      | -                                                                                                                                                                                  |
|                                   | RC vs HMK | 0.787   | cecum   | -                                                                                                                         | Urea                                                                                                                                                                               |
|                                   |           | 0.003   | humerus | Inosine, Guanosine, Hypoxanthine, Adenosine                                                                               | Xanthosine, 2'-Deoxyinosine, Cyclic GMP, 5-Hydroxyisourate, Guanine, Uric acid                                                                                                     |
| protein digestion and absorption, | NC vs LC  | 0.490   | cecum   | Histamine                                                                                                                 | Tyrosine, L-Glutamine, L-Leucine, L-Lysine, Isovaleric acid, Tyramine                                                                                                              |
|                                   |           | 0.042   | humerus | Isovaleric acid, L-Tryptophan, L-Proline, Phenol, L-Phenylalanine, L-Isoleucine, L-Arginine, L-Histidine, L-Glutamic Acid | P-Cresol, Phenylalanine                                                                                                                                                            |
|                                   | RC vs HMK | 0.204   | cecum   | Isovaleric acid, Indole                                                                                                   | L-Histidine, Histamine, Putrescine,                                                                                                                                                |
|                                   |           | 0.000   | humerus | -                                                                                                                         | L-Glutamic Acid, Phenol, L-Phenylalanine, L-Threonine, L-Serine, L-Isoleucine, L-Tyrosine, L-Arginine, DL-Leucine, L-Lysine, L-Tryptophan, L-Histidine, L-Proline, L-Methionine    |
| aminoacyl-tRNA biosynthesis       | NC vs LC  | 0.664   | cecum   | -                                                                                                                         | Tyrosine, L-Glutamine, L-Leucine L-Lysine                                                                                                                                          |
|                                   |           | 0.050   | humerus | L-Tryptophan, L-Proline, L-Phenylalanine, L-Isoleucine, L-Arginine, L-Histidine, L-Glutamic Acid                          | Phenylalanine                                                                                                                                                                      |
|                                   | RC vs HMK | 0.897   | cecum   | -                                                                                                                         | L-Histidine                                                                                                                                                                        |
|                                   |           | 0.000   | humerus | -                                                                                                                         | L-Glutamic Acid, L-Phenylalanine, L-Threonine, L-Serine, L-Isoleucine, L-Tyrosine, L-Arginine DL-Leucine, L-Lysine, Cyclic GMP, L-Tryptophan, L-Histidine, L-Proline, L-Methionine |

<sup>1</sup> The significantly increased (red) or decreased (green) metabolites were screened out according to  $VIP \geq 1$  and  $p < 0.05$ . “-” represents no significant metabolite was detected.
